# Supplementary material for: Boosting alkaline hydrogen evolution performance of Co4N porous nanowires by interface engineering of CeO2 tuning
Source: Royal Society of Chemistry journal article supplement (doi:10.1039/d0ta08347j), 2020-12-10
Supplement: d0ta08347j1.pdf [file d0ta08347j1.pdf]

## Boosting alkaline hydrogen evolution performance of Co<sub>4</sub>N porous nanowires by interface engineering of CeO<sub>2</sub> tuning

Mengjie Lu,<sup>‡a</sup> Duo Chen,<sup>‡a</sup> Boran Wang,<sup>c</sup> Ruiqing Li,<sup>\*b</sup> Dong Cai,<sup>d</sup> Haoran Tu,<sup>e</sup> Hang Yang,<sup>a</sup> Yupu Zhang<sup>a</sup> and Wei Han<sup>\*a</sup>

<sup>a</sup> Sino-Russian International Joint Laboratory for Clean Energy and Energy Conversion Technology, College of Physics, International Center of Future Science, Jilin university, Changchun 130012, P.R. China. E-mail: [whan@jlu.edu.cn](mailto:whan@jlu.edu.cn)

<sup>b</sup> School of Chemistry and Chemical Engineering, Shandong Provincial Key Laboratory of Chemical Energy Storage and Novel Cell Technology, Liaocheng University, Liaocheng, 252059, China. E-mail: [liruiqing16@163.com](mailto:liruiqing16@163.com)

<sup>c</sup> State Key Laboratory of Inorganic Synthesis and Preparative Chemistry, College of Chemistry, Jilin University, Changchun 130012, P. R. China.

<sup>d</sup>.Key Laboratory of Carbon Materials of Zhejiang Province, Wenzhou University, Wenzhou, 325035, P.R. China.

<sup>e</sup> DongGuan University of Technology, DongGuan, 523808, P. R. China.

<sup>‡</sup> These authors contributed equally to this work.

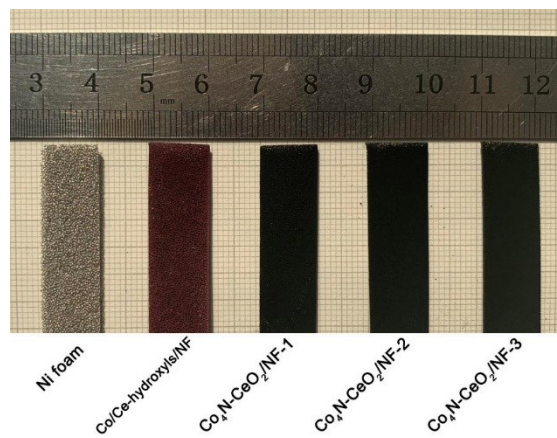

**Figure S1.** Optical pictures of as-prepared samples.

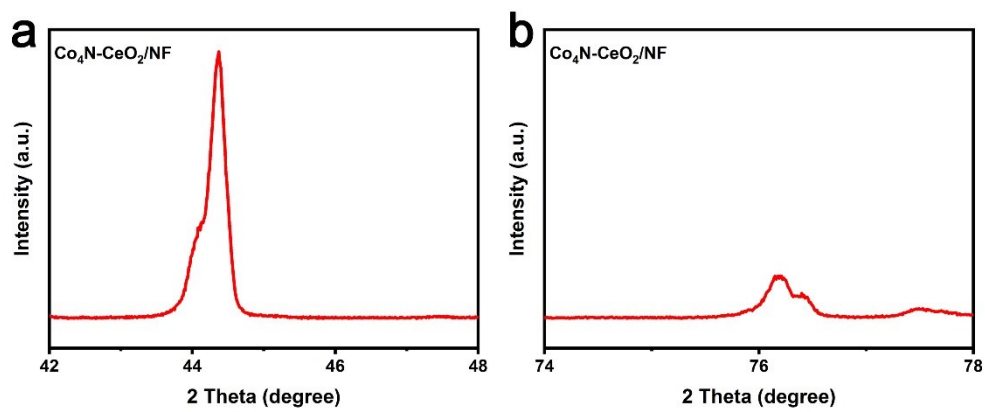

**Figure S2.** The enlarged XRD patterns of the Co<sub>4</sub>N-CeO<sub>2</sub>/NF.

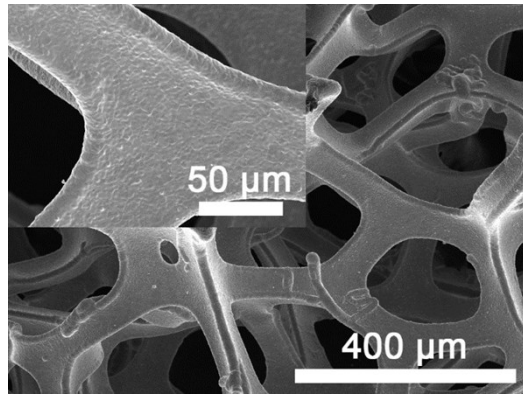

**Figure S3.** Typical SEM images of the starting Ni foam.

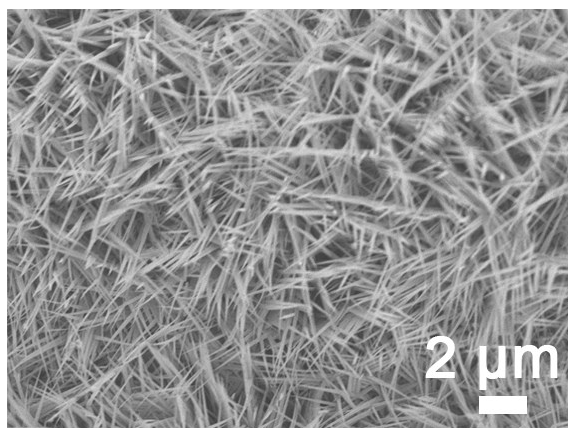

**Figure S4.** SEM image of  $\text{Co}_3\text{O}_4\text{-CeO}_2/\text{NF}$  nanowires on Ni foam.

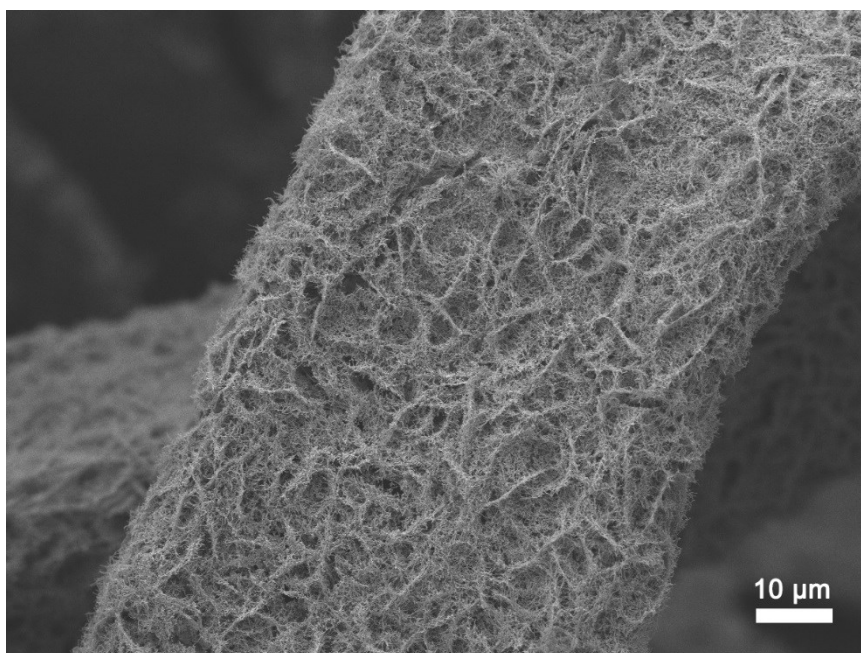

**Figure S5.** The low-resolution SEM image of  $\text{Co}_4\text{N-CeO}_2/\text{NF-2}$  nanoarrays on Ni foam

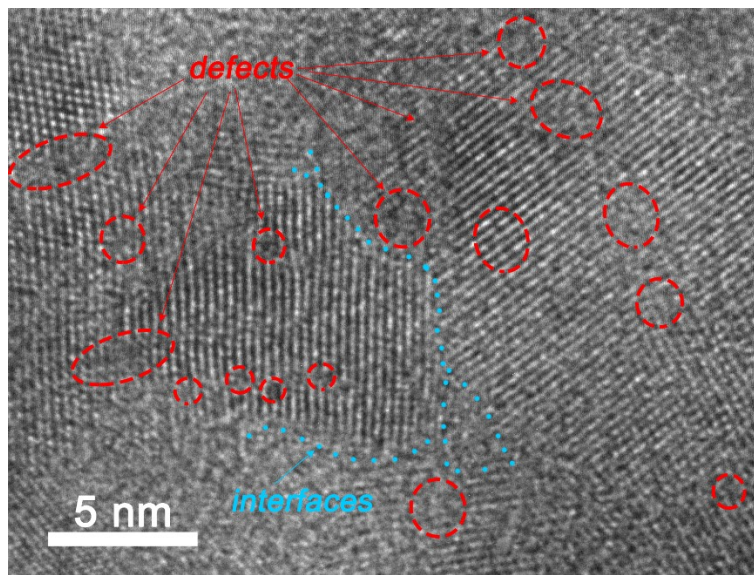

**Figure S6.** HRTEM images of Co<sub>4</sub>N-CeO<sub>2</sub>/NF.

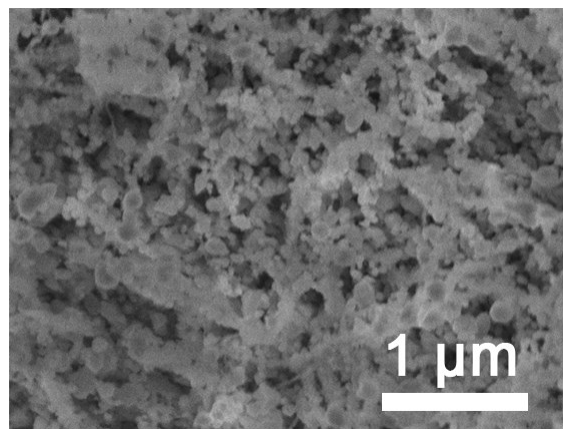

**Figure S7.** SEM image of pure Co<sub>4</sub>N on Ni foam.

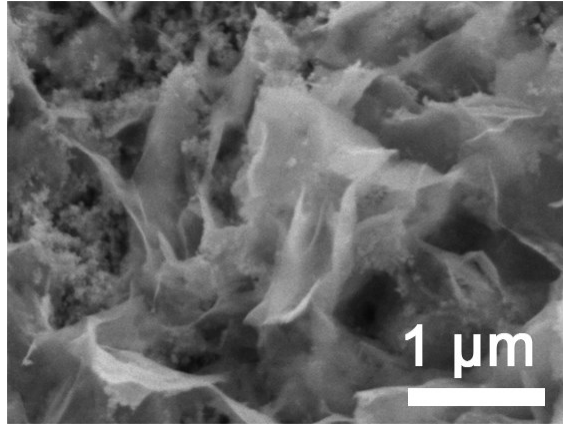

**Figure S8.** SEM images of pure CeO<sub>2</sub> on Ni foam.

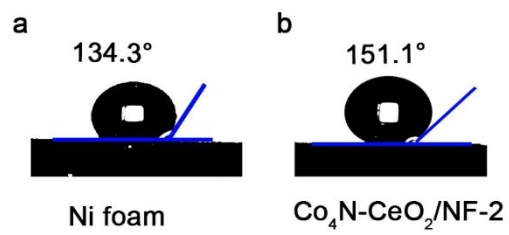

**Figure S9.** Digital images of air bubbles on (a) blank Ni foam and (b) Co<sub>4</sub>N-CeO<sub>2</sub>/NF-2.

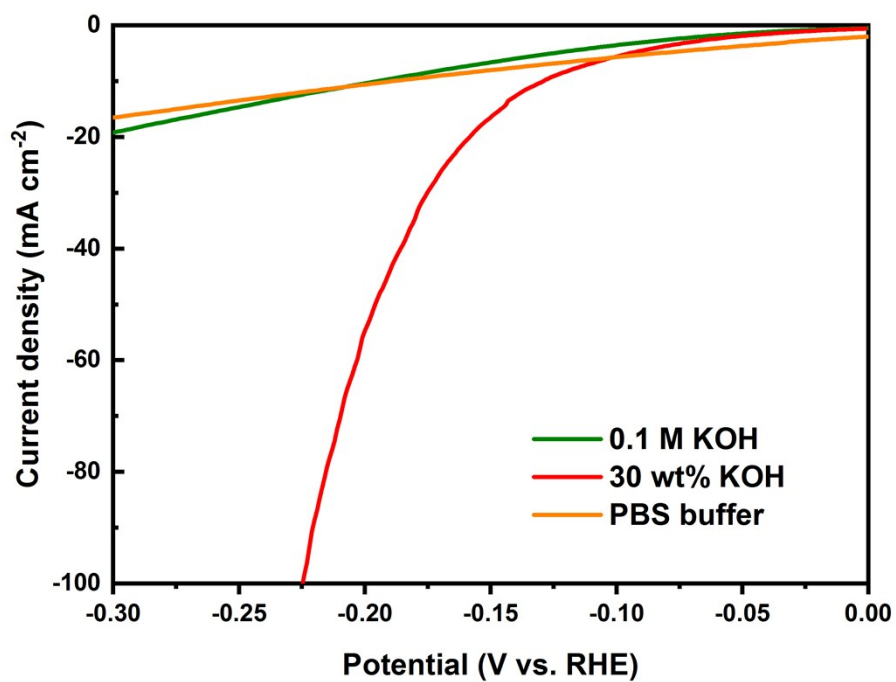

**Figure S10.** HER polarization curves of Co<sub>4</sub>N-CeO<sub>2</sub>/NF-2 electrodes in different electrolyte of 0.1 M KOH, 30 wt% KOH and PBS buffer solution.

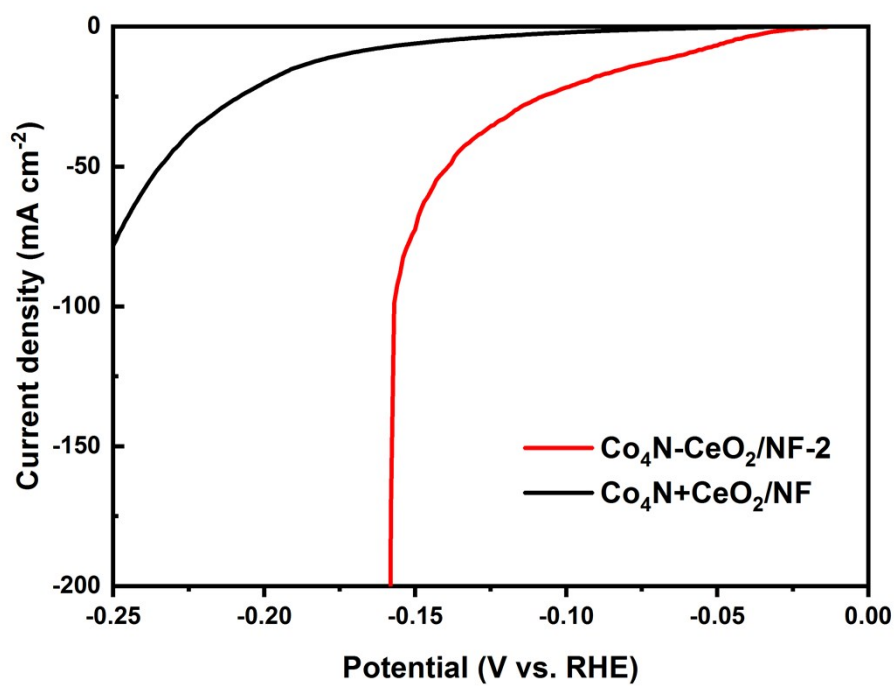

**Figure S11.** HER polarization curves of the Co<sub>4</sub>N-CeO<sub>2</sub>/NF-2 electrode compared to the physical mixture of Co<sub>4</sub>N and CeO<sub>2</sub> casted on the Ni foam.



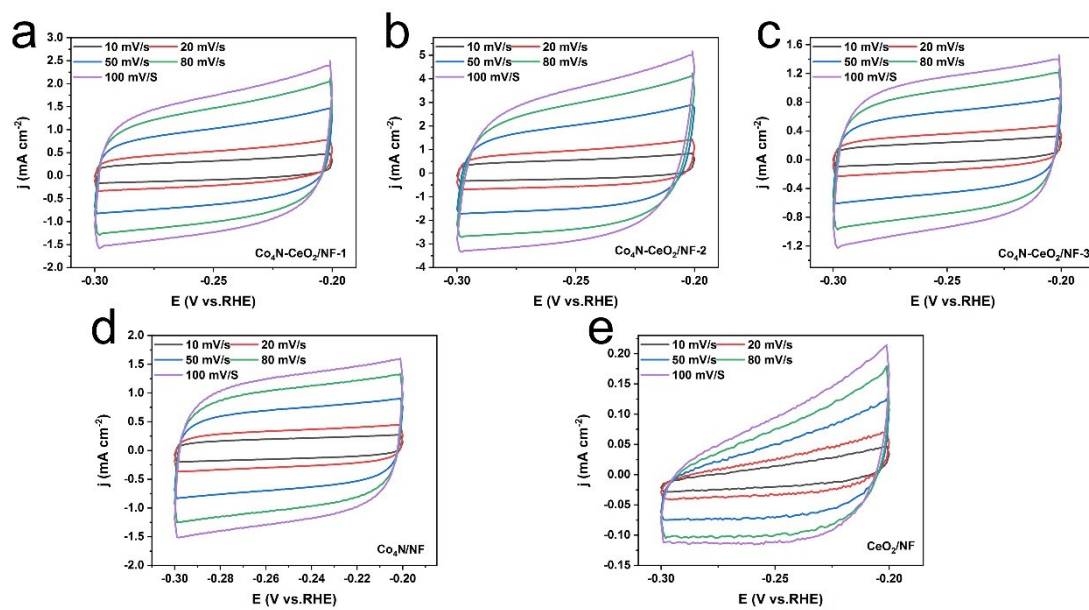

**Figure S12.** Typical cyclic voltammograms at different scan rates. (a)  $\text{Co}_4\text{N-CeO}_2/\text{NF-1}$ , (b)  $\text{Co}_4\text{N-CeO}_2/\text{NF-2}$ , (c)  $\text{Co}_4\text{N-CeO}_2/\text{NF-3}$ , (d)  $\text{Co}_4\text{N}/\text{NF}$  and (e)  $\text{CeO}_2/\text{NF}$  with scan rates ranging from 10 mV/s to 100 mV/s.

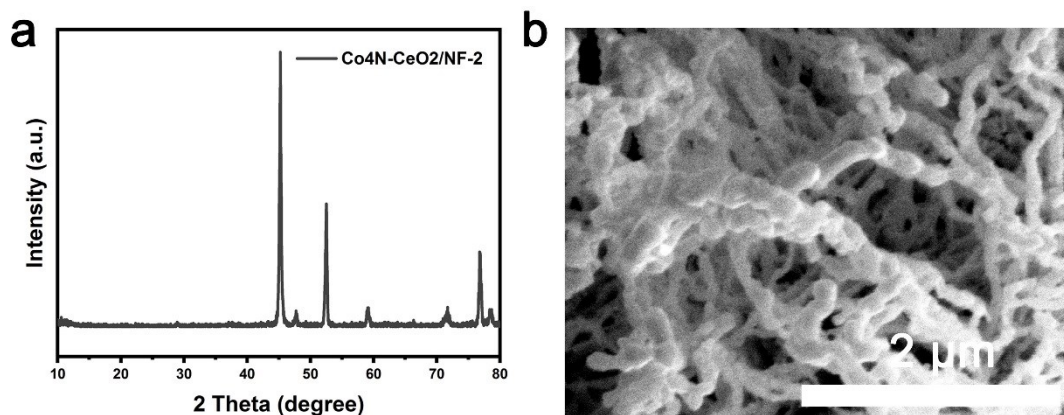

**Figure S13.** Characterizations after the HER stability test. (a) The XRD pattern and (b) SEM image of  $\text{Co}_4\text{N-CeO}_2/\text{NF-2}$  after HER stability test.

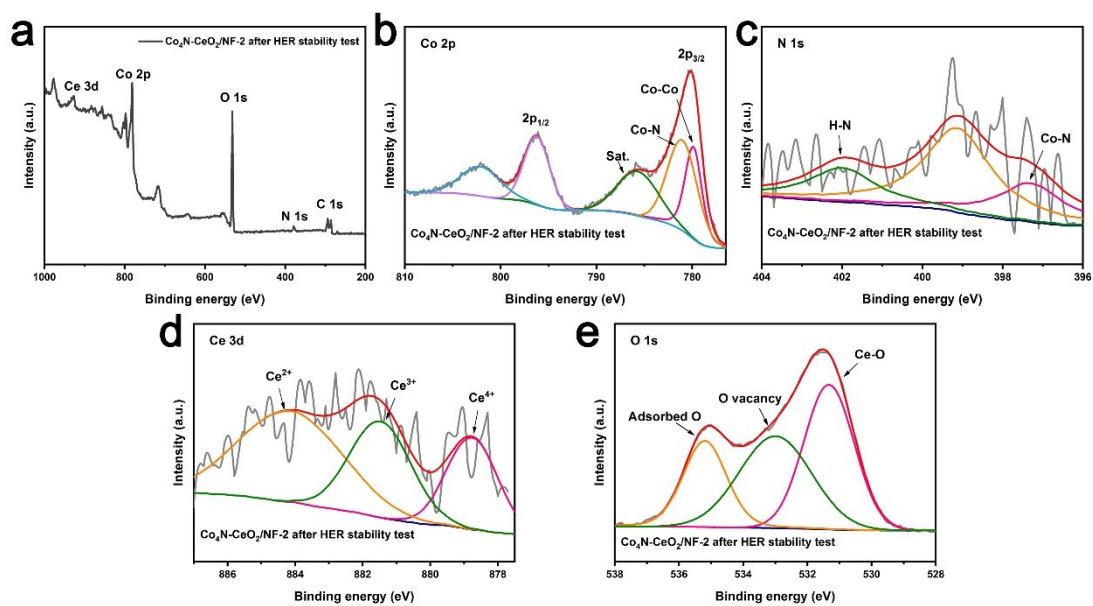

**Figure S14.** XPS spectra of (a) survey, (b) Co 2p, (c) N 1s, (d) Ce 3d, and (e) O 1s for the  $\text{Co}_4\text{N-CeO}_2/\text{NF-2}$  electrode after HER stability test.

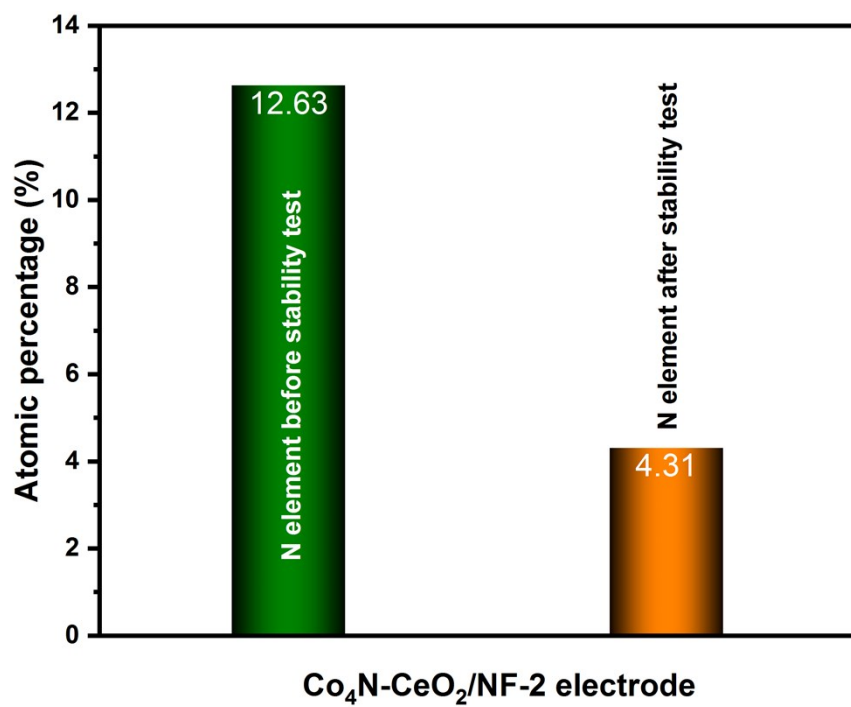

**Figure S15.** The atomic percentage of N element before and after HER stability test.

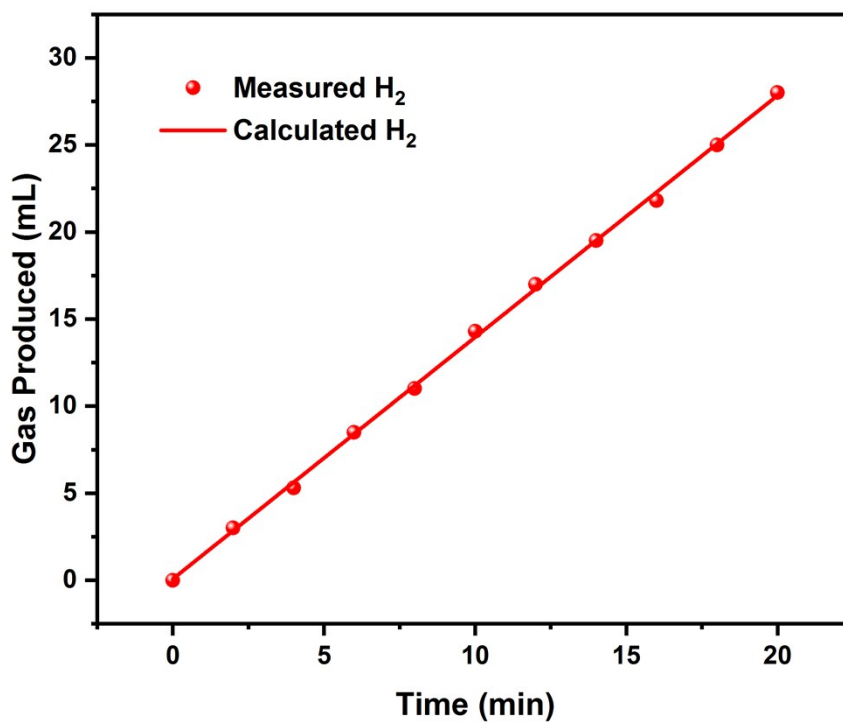

**Figure S16.** Experimental and theoretical calculated amount of the evolved H<sub>2</sub> over the Co<sub>4</sub>N-CeO<sub>2</sub>/NF-2 electrode at a constant current density of 200 mA cm<sup>-2</sup> in 1.0 M KOH electrolyte.

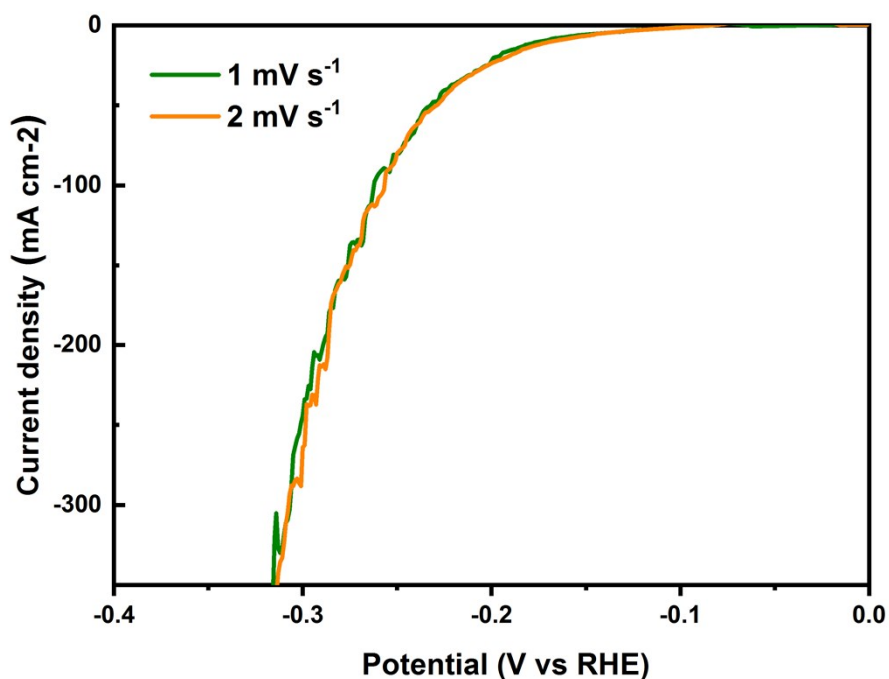

**Figure S17.** The HER polarization curves without  $iR$ -correction of the  $\text{Co}_4\text{N-CeO}_2/\text{NF-2}$  different sweep speeds.

**Table S1.** Comparison of the electrocatalytic HER activity for  $\text{Co}_4\text{N-CeO}_2/\text{NF}$  and reported catalysts in 1.0 M KOH electrolyte.

| Catalysts                                        | Substrate       | $\eta_{j=10}$<br>(mV) | $b$ (mV<br>$\text{dec}^{-1}$ ) | Refs      |
|--------------------------------------------------|-----------------|-----------------------|--------------------------------|-----------|
| Ni/CeO <sub>2</sub>                              | CNT             | 91                    | ---                            | S1        |
| CoN/Ni <sub>3</sub> N                            | Carbon<br>cloth | 68                    | 69                             | S2        |
| Cu <sub>4</sub> N/Ni <sub>3</sub> N              | Carbon<br>cloth | 71.4                  | 106.5                          | S3        |
| Mo <sub>2</sub> N/Mo <sub>2</sub> C              | GC              | 152                   | 68                             | S4        |
| CoP/NiCoP                                        | Ti foil         | 133                   | 88                             | S5        |
| Co <sub>3</sub> O <sub>4</sub> -CeO <sub>2</sub> | Carbon<br>cloth | 90                    | 57.8                           | S6        |
| NF@NiFe<br>LDH/CeO <sub>x</sub>                  | Ni foam         | 154                   | 101                            | S7        |
| Ni <sub>3</sub> N-CeO <sub>2</sub>               | Ti mesh         | 80                    | 122                            | S8        |
| Co <sub>4</sub> N-CeO <sub>2</sub>               | Ni foam         | 52                    | 56.8                           | This work |

**Table S2.** Comparison of the electrocatalytic HER activity for Co<sub>4</sub>N-CeO<sub>2</sub>/NF and reported catalysts at high current density of 50 or 100 mA cm<sup>-2</sup> in 1.0 M KOH electrolyte.

| Catalysts                                                                        | Substrate | $\eta_{j=50/100}$<br>(mV) | Refs         |
|----------------------------------------------------------------------------------|-----------|---------------------------|--------------|
| Ni <sub>3</sub> S <sub>2</sub> /MnO <sub>2</sub>                                 | Ni foam   | $\eta_{100}=197$          | S9           |
| NiFe<br>LDH@Ni <sub>3</sub> N                                                    | Ni foam   | $\eta_{100}=142$          | S10          |
| Ni <sub>x</sub> Co <sub>3-x</sub> S <sub>4</sub> /Ni <sub>3</sub> S <sub>2</sub> | Ni foam   | $\eta_{100}=258$          | S11          |
| Co-doped<br>CeO <sub>2</sub>                                                     | Cu foam   | $\eta_{100}=132$          | S12          |
| CeO <sub>2</sub> -Cu <sub>3</sub> P                                              | Ni foam   | $\eta_{50}=228$           | S13          |
| NiFe<br>LDH/CeO <sub>x</sub>                                                     | Ni foam   | $\eta_{100}=267$          | S14          |
| Sn-Ni <sub>3</sub> S <sub>2</sub>                                                | Ni foam   | $\eta_{100}=171$          | S15          |
| CoNi/CoFe <sub>2</sub> O <sub>4</sub>                                            | Ni foam   | $\eta_{100}=189$          | S16          |
| Co <sub>4</sub> N-CeO <sub>2</sub>                                               | Ni foam   | $\eta_{100}=149$          | This<br>work |

## References

- [S1]. Z. Weng, W. Liu, L. C. Yin, R. Fang, M. Li, E. I. Altman, Q. Fan, F. Li, H. M. Cheng and H. Wang, *Nano lett.*, 2015, **15**, 7704-7710.
- [S2]. C. Ray, S. C. Lee, B. Jin, A. Kundu, J. H. Park and S. Chan Jun, *J. Mater. Chem. A*, 2018, **6**, 4466-4476.
- [S3]. Z. Wang, L. Xu, F. Huang, L. Qu, J. Li, K. A. Owusu, Z. Liu, Z. Lin, B. Xiang, X. Liu, K. Zhao, X. Liao, W. Yang, Y. B. Cheng and L. Mai, *Adv. Energy Mater.*, 2019, **9**, 1900390.
- [S4]. Z. Lv, M. Tahir, X. Lang, G. Yuan, L. Pan, X. Zhang and J.-J. Zou, *J. Mater. Chem. A*, 2017, **5**, 20932-20937.
- [S5]. Y. Lin, K. Sun, S. Liu, X. Chen, Y. Cheng, W. C. Cheong, Z. Chen, L. Zheng, J. Zhang, X. Li, Y. Pan and C. Chen, *Adv. Energy Mater.*, 2019, **9**, 1901213.
- [S6]. B. Liu, J. Cheng, H.-Q. Peng, D. Chen, X. Cui, D. Shen, K. Zhang, T. Jiao, M. Li, C.-S. Lee and W. Zhang, *J. Mater. Chem. A*, 2019, **7**, 775-782.
- [S7]. X. Wang, Y. Yang, L. Diao, Y. Tang, F. He, E. Liu, C. He, C. Shi, J. Li, J. Sha, S. Ji, P. Zhang, L. Ma and N. Zhao, *ACS Appl. Mater. Interfaces*, 2018, **10**, 35145-35153.
- [S8]. Z. Sun, J. Zhang, J. Xie, X. Zheng, M. Wang, X. Li and B. Tang, *Inorg. Chem. Front.*, 2018, **5**, 3042-3045.
- [S9]. Y. Xiong, L. L. Xu, C. D. Jin and Q. F. Sun, *Appl. Catal., B*, 2019, 254, 329-338.
- [S10]. B. R. Wang, S. H. Jiao, Z. S. Wang, M. J. Lu, D. Chen, Y. T. Kang, G. S. Pang and S. H. Feng, *J. Mater. Chem. A*, 2020, **8**, 17202-17211.
- [S11]. Y. Wu, Y. Liu, G.-D. Li, X. Zou, X. Lian, D. Wang, L. Sun, T. Asefa and X. Zou, *Nano Energy*, 2017, **35**, 161-170.
- [S12]. S. Jiang, R. Zhang, H. Liu, Y. Rao, Y. Yu, S. Chen, Q. Yue, Y. Zhang and Y. Kang, *J. Am. Chem. Soc.*, 2020, **142**, 6461-6466.
- [S13]. Z. Wang, H. Du, Z. Liu, H. Wang, A. M. Asiri and X. Sun, *Nanoscale*, 2018, **10**, 2213-2217.
- [S14]. X. Wang, Y. Yang, L. Diao, Y. Tang, F. He, E. Liu, C. He, C. Shi, J. Li, J. Sha, S. Ji, P. Zhang, L. Ma and N. Zhao, *ACS Appl. Mater. Interfaces*, 2018, **10**, 35145-35153.
- [S15]. J. Jian, L. Yuan, H. Qi, X. Sun, L. Zhang, H. Li, H. Yuan and S. Feng, *ACS Appl. Mater. Interfaces*, 2018, **10**, 40568-40576.
- [S16]. S. S. Li, S. Sirisomboonchai, A. Yoshida, X. W. An, X. G. Hao, A. Abudula and G. Q. Guan, *J. Mater. Chem. A*, 2018, **6**, 19221-19230.
